# Supplementary material
Source: PubMed Central journal article supplement (PMC7269775)
Supplement: ajcr0010-1344-f4.pdf [file ajcr0010-1344-f4.pdf]

## Random forest model for multicategory death-cause of prostate cancer

**Table S1.** Baseline characteristics of the training and validation sets

|                                 | Training set (n=25,000) | Testing set (n=24,864) | Total (n=49,864) | P value |
|---------------------------------|-------------------------|------------------------|------------------|---------|
| Survival time (mo)              | 117 (16-154)            | 117 (16-154)           | 117 (16-154)     | 0.183   |
| Cause of death                  |                         |                        |                  | 0.663   |
| Alive                           | 14865                   | 14746                  | 29611            |         |
| (%)                             | (59.5)                  | (59.3)                 | (59.4)           |         |
| CVD                             | 2759                    | 2689                   | 5448             |         |
| (%)                             | (11.0)                  | (10.8)                 | (10.9)           |         |
| Infection                       | 346                     | 371                    | 717              |         |
| (%)                             | (1.4)                   | (1.5)                  | (1.4)            |         |
| Non-Prostate cancer             | 1808                    | 1873                   | 3681             |         |
| (%)                             | (7.2)                   | (7.5)                  | (7.4)            |         |
| Other cause                     | 2903                    | 2897                   | 5800             |         |
| (%)                             | (11.6)                  | (11.7)                 | (11.6)           |         |
| Prostate cancer                 | 2319                    | 2288                   | 4607             |         |
| (%)                             | (9.3)                   | (9.2)                  | (9.2)            |         |
| Age at diagnosis, quartile (yr) |                         |                        |                  | 0.539   |
| <61                             | 6665                    | 6502                   | 13167            |         |
| (%)                             | (26.7)                  | (26.2)                 | (26.4)           |         |
| 61-67                           | 6303                    | 6353                   | 12656            |         |
| (%)                             | (25.2)                  | (25.6)                 | (25.4)           |         |
| 67-74                           | 6040                    | 6043                   | 12083            |         |
| (%)                             | (24.2)                  | (24.3)                 | (24.2)           |         |
| 75+                             | 5992                    | 5966                   | 11958            |         |
| (%)                             | (24.0)                  | (24.0)                 | (24.0)           |         |
| Race                            |                         |                        |                  | 0.317   |
| API                             | 1184                    | 1157                   | 2341             |         |
| (%)                             | (4.7)                   | (4.7)                  | (4.7)            |         |
| Hispanic                        | 2098                    | 2213                   | 4311             |         |
| (%)                             | (8.4)                   | (8.9)                  | (8.7)            |         |
| NH Black                        | 3500                    | 3510                   | 7010             |         |
| (%)                             | (14.0)                  | (14.1)                 | (14.1)           |         |
| NH White                        | 17859                   | 17641                  | 35500            |         |
| (%)                             | (71.4)                  | (71.0)                 | (71.2)           |         |
| Unknown/Other                   | 359                     | 343                    | 702              |         |
| (%)                             | (1.4)                   | (1.4)                  | (1.4)            |         |
| TNM6 T category                 |                         |                        |                  | 0.850   |
| T1/2                            | 21823                   | 21689                  | 43512            |         |
| (%)                             | (87.3)                  | (87.2)                 | (87.3)           |         |
| T3/4                            | 2191                    | 2170                   | 4361             |         |
| (%)                             | (8.8)                   | (8.7)                  | (8.8)            |         |
| Unknown/Other                   | 986                     | 1005                   | 1991             |         |
| (%)                             | (3.9)                   | (4.0)                  | (4.0)            |         |
| TNM6 N category                 |                         |                        |                  | 0.744   |
| 0                               | 22638                   | 22469                  | 45107            |         |
| (%)                             | (90.6)                  | (90.4)                 | (90.5)           |         |
| 1                               | 406                     | 420                    | 826              |         |
| (%)                             | (1.6)                   | (1.7)                  | (1.7)            |         |
| Unknown/Other                   | 1956                    | 1975                   | 3931             |         |
| (%)                             | (7.8)                   | (7.9)                  | (7.9)            |         |

Random forest model for multicategory death-cause of prostate cancer

|                                            |        |        |        |       |
|--------------------------------------------|--------|--------|--------|-------|
| TNM6 M category                            |        |        |        | 0.997 |
| 0                                          | 22813  | 22686  | 45499  |       |
| (%)                                        | (91.3) | (91.2) | (91.3) |       |
| 1                                          | 1009   | 1003   | 2012   |       |
| (%)                                        | (4.0)  | (4.0)  | (4.0)  |       |
| Unknown/Other                              | 1178   | 1175   | 2353   |       |
| (%)                                        | (4.7)  | (4.7)  | (4.7)  |       |
| AJCC6 staging                              |        |        |        | 0.662 |
| 1                                          | 62     | 48     | 110    |       |
| (%)                                        | (0.3)  | (0.2)  | (0.2)  |       |
| 2                                          | 20258  | 20103  | 40361  |       |
| (%)                                        | (81.0) | (80.9) | (80.9) |       |
| 3                                          | 1529   | 1517   | 3046   |       |
| (%)                                        | (6.1)  | (6.1)  | (6.1)  |       |
| 4                                          | 1452   | 1480   | 2932   |       |
| (%)                                        | (5.8)  | (6.0)  | (5.9)  |       |
| Unknown/Other                              | 1699   | 1716   | 3415   |       |
| (%)                                        | (6.8)  | (6.9)  | (6.9)  |       |
| Chemotherapy                               |        |        |        | 0.793 |
| None/Unknown                               | 24820  | 24680  | 49500  |       |
| (%)                                        | (99.3) | (99.3) | (99.3) |       |
| Received                                   | 180    | 184    | 364    |       |
| (%)                                        | (0.7)  | (0.7)  | (0.7)  |       |
| Radiotherapy                               |        |        |        | 0.047 |
| None/Unknown                               | 15578  | 15278  | 30856  |       |
| (%)                                        | (62.3) | (61.5) | (61.9) |       |
| Received                                   | 9422   | 9586   | 19008  |       |
| (%)                                        | (37.7) | (38.6) | (38.1) |       |
| Surgery                                    |        |        |        | 0.389 |
| Local Excision                             | 1610   | 1564   | 3174   |       |
| (%)                                        | (6.4)  | (6.3)  | (6.4)  |       |
| No surgery                                 | 15323  | 15386  | 30709  |       |
| (%)                                        | (61.3) | (61.9) | (61.6) |       |
| Prostatectomy                              | 8067   | 7914   | 15981  |       |
| (%)                                        | (32.3) | (31.8) | (32.1) |       |
| Rural-urban continuum 2003§                |        |        |        | 0.887 |
| Metro                                      | 22084  | 21974  | 44058  |       |
| (%)                                        | (88.3) | (88.4) | (88.4) |       |
| Non-Metro                                  | 2916   | 2890   | 5806   |       |
| (%)                                        | (11.7) | (11.6) | (11.6) |       |
| Census region                              |        |        |        | 0.315 |
| Midwest                                    | 2628   | 2494   | 5122   |       |
| (%)                                        | (10.5) | (10.0) | (10.3) |       |
| Northeast                                  | 4033   | 3995   | 8028   |       |
| (%)                                        | (16.1) | (16.1) | (16.1) |       |
| South                                      | 5081   | 5053   | 10134  |       |
| (%)                                        | (20.3) | (20.3) | (20.3) |       |
| West                                       | 13258  | 13322  | 26580  |       |
| (%)                                        | (53.0) | (53.6) | (53.3) |       |
| Percent of education attainment, quartile§ |        |        |        | 0.456 |

## Random forest model for multicategory death-cause of prostate cancer

|                                              |        |        |        |       |
|----------------------------------------------|--------|--------|--------|-------|
| Q1, <15.08                                   | 6450   | 6296   | 12746  |       |
| (%)                                          | (25.8) | (25.3) | (25.6) |       |
| Q2, 15.09-18.15                              | 6293   | 6213   | 12506  |       |
| (%)                                          | (25.2) | (25.0) | (25.1) |       |
| Q3, 18.17-25.79                              | 6233   | 6246   | 12479  |       |
| (%)                                          | (24.9) | (25.1) | (25.0) |       |
| Q4, >50.77                                   | 6024   | 6109   | 12133  |       |
| (%)                                          | (24.1) | (24.6) | (24.3) |       |
| Percent of persons in poverty, quartile§     |        |        |        | 0.182 |
| Q1, <21.18                                   | 6406   | 6173   | 12579  |       |
| (%)                                          | (25.6) | (24.8) | (25.2) |       |
| Q2, 21.33-29.81                              | 6212   | 6170   | 12382  |       |
| (%)                                          | (24.9) | (24.8) | (24.8) |       |
| Q3, 29.86-37.36                              | 6375   | 6448   | 12823  |       |
| (%)                                          | (25.5) | (25.9) | (25.7) |       |
| Q4, >67.40                                   | 6007   | 6073   | 12080  |       |
| (%)                                          | (24.0) | (24.4) | (24.2) |       |
| Percent of foreign-born residents, quartile§ |        |        |        | 0.223 |
| Q1, <5.95                                    | 6259   | 6080   | 12339  |       |
| (%)                                          | (25.0) | (24.5) | (24.8) |       |
| Q2, 5.98-15.22                               | 6481   | 6365   | 12846  |       |
| (%)                                          | (25.9) | (25.6) | (25.8) |       |
| Q3, 15.45-21.55                              | 6068   | 6124   | 12192  |       |
| (%)                                          | (24.3) | (24.6) | (24.5) |       |
| Q4, >38.52                                   | 6192   | 6295   | 12487  |       |
| (%)                                          | (24.8) | (25.3) | (25.0) |       |
| Confirmation method of diagnosis             |        |        |        | 0.686 |
| Microscopic                                  | 24553  | 24407  | 48960  |       |
| (%)                                          | (98.2) | (98.2) | (98.2) |       |
| Radiologic and clinic                        | 306    | 302    | 608    |       |
| (%)                                          | (1.2)  | (1.2)  | (1.2)  |       |
| Unknown/Other                                | 141    | 155    | 296    |       |
| (%)                                          | (0.6)  | (0.6)  | (0.6)  |       |
| PSA, quartiles (ng/ml)                       |        |        |        | 0.854 |
| <4.9                                         | 5546   | 5573   | 11119  |       |
| (%)                                          | (22.2) | (22.4) | (22.3) |       |
| 5.0-6.8                                      | 5231   | 5207   | 10438  |       |
| (%)                                          | (20.9) | (20.9) | (20.9) |       |
| 6.9-11.3                                     | 5179   | 5131   | 10310  |       |
| (%)                                          | (20.7) | (20.6) | (20.7) |       |
| 11.3+                                        | 5243   | 5253   | 10496  |       |
| (%)                                          | (21.0) | (21.1) | (21.1) |       |
| Unknown/Other                                | 3801   | 3700   | 7501   |       |
| (%)                                          | (15.2) | (14.9) | (15.0) |       |
| Gleason score                                |        |        |        | 0.957 |
| 5                                            | <15*   | <15*   | 15     |       |
| (%)                                          |        |        | (0.0)  |       |
| 6                                            | 192    | 182    | 374    |       |
| (%)                                          | (0.8)  | (0.7)  | (0.8)  |       |

## Random forest model for multicategory death-cause of prostate cancer

|               |        |        |        |
|---------------|--------|--------|--------|
| 7             | 169    | 166    | 335    |
| (%)           | (0.7)  | (0.7)  | (0.7)  |
| 8             | 50     | 44     | 94     |
| (%)           | (0.2)  | (0.2)  | (0.2)  |
| 9             | 35     | 30     | 65     |
| (%)           | (0.1)  | (0.1)  | (0.1)  |
| 10            | <15*   | <15*   | <15*   |
| (%)           |        |        |        |
| Unknown/Other | 24541  | 24432  | 48973  |
| (%)           | (98.2) | (98.3) | (98.2) |

Note: AJCC, 6<sup>th</sup> edition clinical staging of the American Joint Commission on Cancer; API, Asian Pacific Islanders; NH, Non-Hispanic; TNM6, 6<sup>th</sup> edition Tumor, node and metastasis staging manual of the American Joint Commission on Cancer; CVD, cardiovascular disease; PSA, Prostate specific antigen; \*, statistically suppressed; §, Country attributes of Year 2000; Education attainment defined as percent of residents with less than high-school graduate in the county; Person in poverty defined as percent of residents with income below 200% of poverty in the county.

**Table S2.** Prediction accuracy for long-term 6-category causes of death among the patients with prostate cancer diagnosed in 2004 (12-year follow up) using one-hot encoding

| Predicted classes          | Alive,<br>n=14,746 | CVD,<br>n=2,689 | Infection,<br>n=371 | Non-Prostate<br>cancer, n=1,873 | Other cause,<br>n=2,897 | Prostate cancer,<br>n=2,288 | Total,<br>n=24,864 |
|----------------------------|--------------------|-----------------|---------------------|---------------------------------|-------------------------|-----------------------------|--------------------|
| <b>Random forest model</b> |                    |                 |                     |                                 |                         |                             |                    |
| Alive, %                   | 88.87*             | 56.56           | 57.68               | 69.62                           | 59.20                   | 41.78                       | 75.67              |
| CVD, %                     | 3.54               | 14.95*          | 13.75               | 9.24                            | 13.95                   | 8.65                        | 7.04               |
| Infection, %               | 0.20               | 0.60            | 0.27*               | 0.27                            | 0.62                    | 0.39                        | 0.31               |
| Non-Prostate cancer, %     | 1.70               | 2.98            | 2.43                | 2.72*                           | 2.93                    | 2.80                        | 2.17               |
| Other cause, %             | 3.49               | 15.43           | 15.09               | 9.72                            | 13.84*                  | 9.35                        | 7.17               |
| Prostate cancer, %         | 2.20               | 9.48            | 10.78               | 8.44                            | 9.46                    | 37.02*                      | 7.64               |
| <b>Multinomial model</b>   |                    |                 |                     |                                 |                         |                             |                    |
| Alive, %                   | 84.90*             | 34.85           | 32.35               | 53.66                           | 39.28                   | 27.93                       | 65.79              |
| Prostate cancer, %         | 0.01               | 0.00            | 0.27                | 0.00                            | 0.00                    | 0.09*                       | 0.02               |
| NA, %                      | 15.09              | 65.15           | 67.39               | 46.34                           | 60.72                   | 71.98                       | 34.19              |

Note: CVD, cardiovascular disease; NA, not available; \*, correct prediction.

## Random forest model for multicategory death-cause of prostate cancer

**Table S3.** Factors associated with long-term 6-category cause of death among men with prostate cancer in multinomial model

| Covariate                                    | Cause of death         |        |                        |        |                        |        |                        |        |                        |        |
|----------------------------------------------|------------------------|--------|------------------------|--------|------------------------|--------|------------------------|--------|------------------------|--------|
|                                              | CVD                    |        | Infection              |        | Non-Prostate cancer    |        | Other causes           |        | Prostate cancer        |        |
|                                              | coefficient (95% CI)   | P      |
| Age at diagnosis, quartile (yr)*             | 0.92 (0.88 to 0.97)    | <0.001 | 0.91 (0.78 to 1.03)    | <0.001 | 0.62 (0.57 to 0.67)    | <0.001 | 0.84 (0.79 to 0.88)    | <0.001 | 0.51 (0.46 to 0.55)    | <0.001 |
| AJCC6 staging*                               | 0.15 (0.04 to 0.27)    | 0.007  | 0.34 (0.10 to 0.58)    | 0.005  | 0.15 (0.02 to 0.29)    | 0.021  | 0.14 (0.02 to 0.25)    | 0.019  | 0.68 (0.58 to 0.77)    | <0.001 |
| Confirmation method of diagnosis*            | 0.54 (0.24 to 0.85)    | 0.001  | 0.70 (0.16 to 1.24)    | 0.011  | 0.29 (-0.09 to 0.68)   | 0.136  | 0.69 (0.39 to 0.98)    | <0.001 | 0.66 (0.39 to 0.93)    | <0.001 |
| Surgery*                                     | -0.76 (-0.86 to -0.66) | <0.001 | -0.84 (-1.07 to -0.61) | <0.001 | -0.45 (-0.56 to -0.34) | <0.001 | -0.79 (-0.88 to -0.70) | <0.001 | -1.04 (-1.14 to -0.94) | <0.001 |
| PSA, quartiles (ng/ml)*                      | 0.17 (0.13 to 0.20)    | <0.001 | 0.16 (0.07 to 0.25)    | <0.001 | 0.13 (0.09 to 0.17)    | <0.001 | 0.14 (0.11 to 0.17)    | <0.001 | 0.34 (0.30 to 0.38)    | <0.001 |
| Chemotherapy                                 | 0.23 (-0.45 to 0.92)   | 0.505  | -0.11 (-2.11 to 1.88)  | 0.911  | 0.73 (0.11 to 1.36)    | 0.022  | 0.00 (-0.74 to 0.74)   | 0.999  | 2.03 (1.63 to 2.44)    | <0.001 |
| Census region                                | -0.12 (-0.17 to -0.07) | <0.001 | -0.15 (-0.27 to -0.03) | 0.016  | -0.04 (-0.10 to 0.02)  | 0.160  | -0.01 (-0.06 to 0.04)  | 0.829  | 0.06 (0.00 to 0.12)    | 0.048  |
| Percent of education attainment, quartile§   | 0.08 (0.01 to 0.15)    | 0.019  | 0.11 (-0.06 to 0.28)   | 0.198  | 0.14 (0.06 to 0.21)    | 0.001  | 0.11 (0.04 to 0.17)    | 0.002  | 0.08 (0.01 to 0.16)    | 0.031  |
| Percent of persons in poverty, quartile§     | 0.08 (0.01 to 0.15)    | 0.032  | 0.01 (-0.16 to 0.18)   | 0.929  | -0.06 (-0.14 to 0.02)  | 0.161  | 0.01 (-0.06 to 0.08)   | 0.788  | -0.03 (-0.11 to 0.05)  | 0.436  |
| Percent of foreign-born residents, quartile§ | -0.08 (-0.13 to -0.03) | 0.003  | -0.11 (-0.24 to 0.02)  | 0.109  | -0.10 (-0.16 to -0.04) | 0.001  | -0.19 (-0.24 to -0.14) | <0.001 | -0.13 (-0.18 to -0.07) | <0.001 |
| Gleason score                                | -0.03 (-0.13 to 0.07)  | 0.566  | -0.07 (-0.30 to 0.16)  | 0.565  | -0.04 (-0.15 to 0.07)  | 0.454  | 0.06 (-0.05 to 0.17)   | 0.257  | -0.05 (-0.16 to 0.06)  | 0.341  |
| Race                                         | 0.03 (-0.02 to 0.08)   | 0.292  | -0.23 (-0.34 to -0.11) | <0.001 | 0.04 (-0.03 to 0.10)   | 0.252  | 0.01 (-0.05 to 0.06)   | 0.796  | -0.03 (-0.09 to 0.03)  | 0.267  |
| Radiotherapy                                 | -0.22 (-0.31 to -0.12) | <0.001 | -0.40 (-0.63 to -0.16) | 0.001  | -0.07 (-0.18 to 0.04)  | 0.238  | -0.22 (-0.32 to -0.13) | <0.001 | -0.37 (-0.48 to -0.26) | <0.001 |
| Rural-urban continuum 2003§                  | -0.03 (-0.18 to 0.13)  | 0.720  | -0.23 (-0.64 to 0.17)  | 0.261  | 0.11 (-0.07 to 0.28)   | 0.239  | -0.03 (-0.17 to 0.12)  | 0.739  | -0.01 (-0.18 to 0.17)  | 0.948  |
| TNM6 T category                              | 0.08 (-0.05 to 0.21)   | 0.242  | 0.15 (-0.15 to 0.45)   | 0.335  | 0.19 (0.03 to 0.35)    | 0.017  | 0.03 (-0.11 to 0.16)   | 0.714  | 0.50 (0.39 to 0.61)    | <0.001 |
| TNM6 N category                              | -0.05 (-0.13 to 0.02)  | 0.190  | -0.08 (-0.24 to 0.09)  | 0.365  | -0.08 (-0.17 to 0.01)  | 0.065  | -0.05 (-0.12 to 0.03)  | 0.218  | -0.18 (-0.24 to -0.12) | <0.001 |
| TNM6 M category                              | 0.08 (-0.08 to 0.24)   | 0.322  | -0.34 (-0.68 to 0.00)  | 0.053  | 0.06 (-0.13 to 0.25)   | 0.511  | 0.06 (-0.10 to 0.22)   | 0.447  | 0.06 (-0.07 to 0.19)   | 0.357  |

Note: AJCC, 6<sup>th</sup> edition clinical staging of the American Joint Commission on Cancer; TNM6, 6<sup>th</sup> edition Tumor, node and metastasis staging manual of the American Joint Commission on Cancer; CVD, cardiovascular disease; PSA, Prostate specific antigen; \*, factors linked to all causes of death; §, Country attributes of Year 2000; Education attainment defined as percent of residents with less than high-school graduate in the county; Person in poverty defined as percent of residents with income below 200% of poverty in the county.
